# Supplementary material for: Roles of Pyroptosis-Related Genes in the Diagnosis and Subtype Classification of Periodontitis
Source: Hindawi journal article supplement (doi:10.1155/2023/8757233), 2023-04-10

**CHMP2B**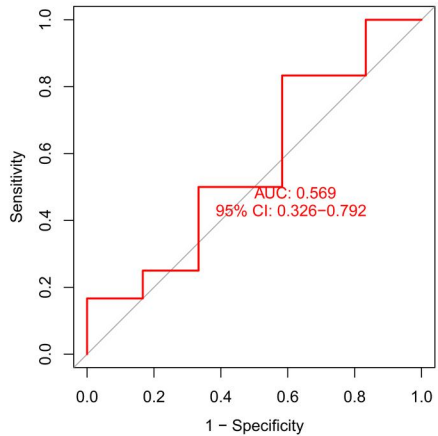**GZMB**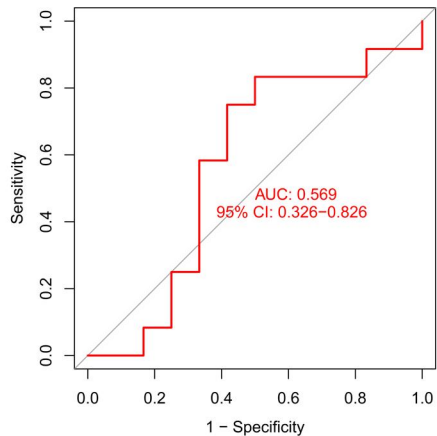**ZBP1**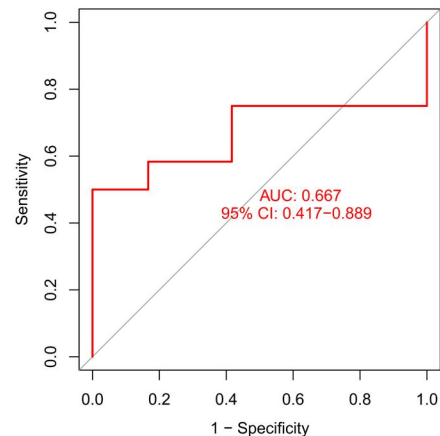**IL1B**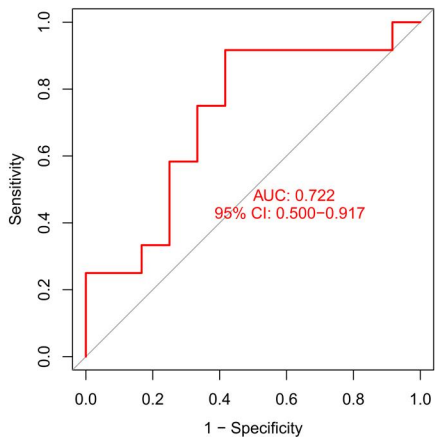**IRF1**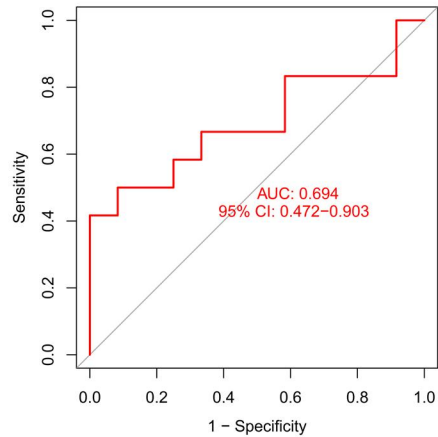

Supplement: f1 [file 8757233.f1.pdf]
